1  
2  
3 **Fenton-type chemistry by a copper enzyme:**  
4 **molecular mechanism of polysaccharide oxidative cleavage**  
5

6 Bastien Bissaro<sup>1,2\*</sup>, Åsmund K. Røhr<sup>2</sup>, Morten Skaugen<sup>2</sup>, Zarah Forsberg<sup>2</sup>, Svein J. Horn<sup>2</sup>,  
7 Gustav Vaaje-Kolstad<sup>2</sup>, and Vincent G.H. Eijsink<sup>2\*</sup>  
8

9 1. INRA, UMR792, Ingénierie des Systèmes Biologiques et des Procédés, F-31400 Toulouse, France

10 2. Department of Chemistry, Biotechnology and Food Science, Norwegian University of  
11 Life Sciences (NMBU), P.O. Box 5003, N-1432 Aas, Norway

12  
13 \*Correspondence to: [bastien.bissaro@nmbu.no](mailto:bastien.bissaro@nmbu.no), [vincent.eijsink@nmbu.no](mailto:vincent.eijsink@nmbu.no)  
14  
15  
16

17 **Abstract:** The discovery of Lytic Polysaccharide Monooxygenases (LPMOs) has been  
18 instrumental for the development of economically sustainable lignocellulose biorefineries.  
19 Despite the obvious importance of these exceptionally powerful redox enzymes, their mode of  
20 action remains enigmatic and their activity and stability under process conditions are hard to  
21 control. By using enzyme assays, mass spectrometry and experiments with labeled oxygen  
22 atoms, we show that H<sub>2</sub>O<sub>2</sub>, and not O<sub>2</sub> as previously thought, is the co-substrate of LPMOs. By  
23 controlling H<sub>2</sub>O<sub>2</sub> supply, stable reaction kinetics and high enzymatic rates are achieved, the  
24 LPMOs work under anaerobic conditions, and the need for adding stoichiometric amounts of  
25 reductants is alleviated. These results offer completely new perspectives regarding the mode of  
26 action of these unique mono-copper enzymes, the enzymatic conversion of biomass in Nature,  
27 and industrial biorefining.  
28

29  
30 **Keywords:** biomass, monooxygenase, copper enzyme, hydrogen peroxide, cellulose, chitin  
31

32 **Abbreviations:** ascorbic acid (AscA); cellobiose dehydrogenase (CDH); chlorophyllin (Chl); glucose-  
33 methanol-choline (GMC) oxidoreductase; glycoside hydrolase (GH); hydrogen atom abstraction (HAA);  
34 lytic polysaccharide monooxygenases (LPMO); particulate methane monooxygenases (pMMO);  
35 superoxide (O<sub>2</sub><sup>•-</sup>); superoxide dismutase (SOD); xanthine (XTH); xanthine oxidase (XOD).  
36  
37

38 The depolymerization of complex plant biomass, primarily composed of cellulose,  
39 various hemicelluloses and lignin, relies on a network of enzymatic and chemical reactions that  
40 is still full of mysteries. Until recently, the degradation of the recalcitrant polysaccharides in  
41 plant biomass was thought to be achieved by an arsenal of hydrolytic enzymes called glycoside  
42 hydrolases (GHs) (1). In some ecosystems, the enzymatic deconstruction process is supported by  
43 Fenton chemistry, i.e. transition metal-driven *in situ* generation of H<sub>2</sub>O<sub>2</sub>-derived hydroxyl  
44 radicals, one of the most powerful oxidizing species found on Earth (2), which can oxidize both  
45 polysaccharides and lignin in plant biomass (3). In 2010, a new class of enzymes was discovered,  
46 which carry out oxidative cleavage of polysaccharides (4). These enzymes, today known as lytic  
47 polysaccharide monooxygenases (LPMOs) (5), are single-copper redox enzymes (6, 7), that can  
48 hydroxylate the C1 or C4 positions of scissile glycosidic bonds (4, 8–10).

49 Despite their abundance in Nature (5, 11) and their obvious industrial importance, for  
50 example in the production of cellulosic ethanol (12), the mode of action of LPMOs remains  
51 enigmatic, although some catalytic mechanisms have been proposed (7, 8, 10, 13, 14). It is well-  
52 established that one LPMO reaction cycle requires the recruitment of two electrons (4, 14–16).  
53 The first electron is often thought to be acquired via reduction of the LPMO's Cu(II) center to  
54 Cu(I) (11). When and how oxygen and the second electron are recruited remains an enigma. It  
55 appears impossible that an electron provider such as cellobiose dehydrogenase (CDH) (11)  
56 carries out direct reduction of the active site copper while the LPMO is bound to the substrate,  
57 whereas it is unlikely that the protein unbinds during catalysis to allow such a direct second  
58 reduction step. The existence of an internal electron channel that would allow electron delivery  
59 to a substrate-bound enzyme has therefore been postulated (10, 17, 18).

60 Interestingly, a recent study has shown that unprecedented high levels of LPMO activity  
61 may be obtained when the enzyme is exposed to visible light in the presence of chlorophyllin  
62 (Chl) and ascorbic acid (AscA) (19). Although this study fell short of mechanistic explanations,  
63 the effect was attributed to the generation of high-energy electrons provided by photoexcited  
64 Chl, with AscA regenerating the Chl. From the increasing amount of publicly available data it  
65 appears clear that LPMO catalytic rates are indeed dependent on the nature of the redox partner  
66 (11, 20), which is intriguing, since it has been shown that the rate of LPMO reduction in solution  
67 is much higher (11, 16) than reported overall rates for LPMO action (4, 14, 21). These  
68 observations made us postulate that a chemical species, common to all known reaction systems

69 but accumulating at different rates, plays an unsuspected key role in the LPMO mechanism.  
70 Looking for a potential culprit for LPMO activity, we studied the Chl/light, Chl/light-AscA and  
71 AscA systems for LPMO activation. A bacterial C1-specific cellulose-active LPMO10 from  
72 *Streptomyces coelicolor* (ScLPMO10C) was used as primary model enzyme.

73 When using the Chl/light-AscA system, with relatively high light intensities, a strong  
74 increase in LPMO activity was indeed observed, notably accompanied by an almost immediate  
75 inactivation of the enzyme (**Fig. 1A**). Since light-exposed chlorophyll may produce superoxide  
76 ( $O_2^{\bullet-}$ ) (22), we investigated whether addition of superoxide dismutase (SOD) or superoxide-  
77 consuming chemicals to the Chl/light-AscA system would allow better control of the reaction,  
78 which turned out not to be the case (**Fig. S1**). On the other hand, we found that both the catalytic  
79 rate and apparent inactivation of the enzyme could be modulated by varying the amount of AscA  
80 (**Fig. 1A; Fig. S2**) or the light intensity (**Fig. S3**). Interestingly, in the absence of AscA, the  
81 Chl/light system yielded good LPMO activity and apparent inactivation of the enzyme was much  
82 reduced, as illustrated by a more linear progress curve for LPMO activity (**Fig. 1A**). Under these  
83 latter conditions, low concentrations of SOD were beneficial for LPMO activity, whereas high  
84 concentrations of SOD were detrimental due to rapid inactivation of the enzyme (**Fig. 1A; Fig.**  
85 **S4**). These results show that the levels of superoxide and/or the products of SOD,  $O_2$  and  $H_2O_2$ ,  
86 affect LPMO activity.

87 **Figure 1C** shows that, in the absence of an LPMO, the Chl/light system produces  $H_2O_2$   
88 and that production is strongly increased by adding SOD, which enzymatically converts  
89 superoxide to  $H_2O_2$ , or AscA, which chemically reduces superoxide to  $H_2O_2$  (**Fig. S5**). These  
90  $H_2O_2$  production levels in the absence of the LPMO (**Fig. 1C**) correlate well with the initial rates  
91 observed in the LPMO reactions (**Fig. 1A**). Moreover, rapid enzyme inactivation in the LPMO  
92 reactions (**Fig. 1A**) correlates with the  $H_2O_2$  production potential (**Fig. 1C**) of the system used  
93 and is associated with accumulation of  $H_2O_2$  in the reaction mixture (**Fig. 1B**). Notably, in the  
94 control reaction with only Chl/light, yielding relatively stable reaction kinetics (**Fig. 1A**),  
95 accumulation of  $H_2O_2$  was not observed (**Fig. 1B**), whereas the Chl/light system does produce  
96  $H_2O_2$  (**Fig. 1C**). Addition of catalase reduced the detrimental effect of adding high amounts of  
97 SOD, reflected in slower inactivation of the LPMO (**Fig. 1A**) and reduced accumulation of  $H_2O_2$   
98 (**Fig. 1B**). All together, these results suggest that  $H_2O_2$  is an unsuspected co-substrate for LPMOs  
99 and that too high levels of  $H_2O_2$  are detrimental. The high initial LPMO rate observed when

100 using the Chl/light+AscA system (**Fig. 1A**) is likely related to fast H<sub>2</sub>O<sub>2</sub> production (up to 200  
101  $\mu$ M within the 12 first minutes of the reaction; **Fig. 1C**), which leads to rapid inactivation of the  
102 enzyme.

103 Control reactions with only AscA, well known for its ability to drive LPMO activity,  
104 yielded more modest H<sub>2</sub>O<sub>2</sub> levels (< 40  $\mu$ M within the first 60 min, **Fig. S6C**), which is likely  
105 related to AscA being less capable of engaging in the thermodynamically challenging reduction  
106 of O<sub>2</sub>, compared to Chl/light. Reactions similar to those in **Fig. 1** but only using AscA generally  
107 yielded less clear results (**Fig. S6A&B**), which is likely due to the many possible redox reactions  
108 involving AscA, superoxide and H<sub>2</sub>O<sub>2</sub> (**Fig S5**). However, the same overall trend stood out: both  
109 higher LPMO activity and faster apparent enzyme inactivation were correlated with higher H<sub>2</sub>O<sub>2</sub>  
110 levels.

111 Reactions with the Chl/light system (i.e. no AscA) seemingly lack a reductant needed to  
112 reduce the LPMO copper, which led us to speculate that O<sub>2</sub><sup>•-</sup> could be involved in LPMO  
113 reduction (**pathway (iv) Fig. S5**). Indeed, chemical (KO<sub>2</sub>) or enzymatic (xanthine/xanthine  
114 oxidase) O<sub>2</sub><sup>•-</sup> generating systems could drive LPMO activity, albeit at low levels (**Fig. S7**).  
115 Control experiments without any reductant but with exogenous H<sub>2</sub>O<sub>2</sub> did not lead to cellulose  
116 oxidation (**Fig. S8**). This latter observation (**Fig. S8**) indicates that only the reduced LPMO can  
117 react with H<sub>2</sub>O<sub>2</sub> and is crucial for the discussions below.

118

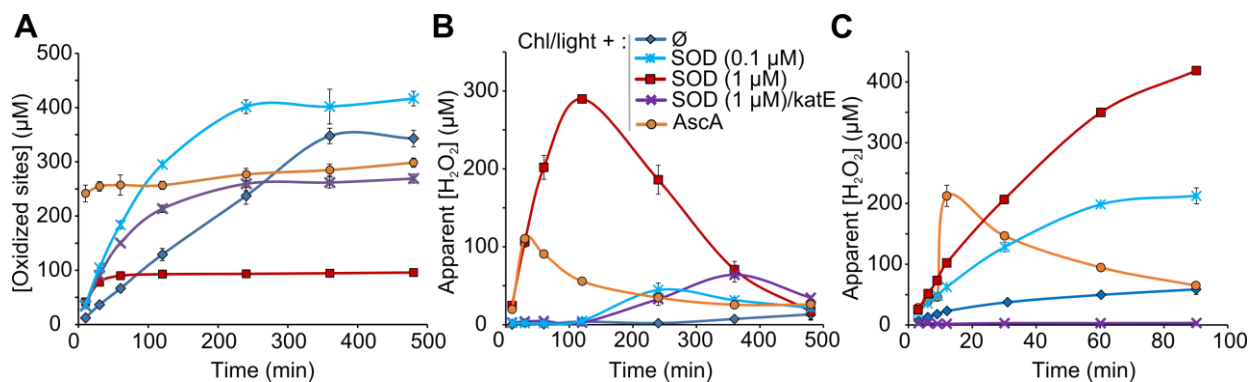

119

120 **Fig. 1. LPMO activity and apparent hydrogen peroxide production when using the**  
121 **Chl/light system for driving the reaction.** Panels A and B show time-courses for the release of  
122 aldonic acid products (A) and H<sub>2</sub>O<sub>2</sub> levels (B) upon incubating Avicel (10 g.L<sup>-1</sup>) with  
123 ScLPMO10C (0.5  $\mu$ M). Reactions were carried out in sodium phosphate buffer (50 mM, pH 7.0)  
124 at 40 °C, under magnetic stirring, with Chl (500  $\mu$ M) exposed to visible light ( $I = 25\% I_{\max}$ ,  
125 approx. 42 W.cm<sup>-2</sup>). Note that, compared to the previous study by Cannella et al. (19), we used  
126 higher light intensities, which likely explains why in our hands, the Chl/light system also works  
127 in the absence of a reductant (blue diamonds). Reaction conditions varied in terms of the  
128 presence of SOD (0.1 or 1  $\mu$ M), a catalase, katE (10  $\mu$ g.mL<sup>-1</sup>), or AscA (1 mM). **Panel C** shows

129 the apparent production of H<sub>2</sub>O<sub>2</sub> in the absence of ScLPMO10C, with all other conditions being  
130 the same as for Panels A & B. Control reactions in the dark did not yield detectable levels of  
131 oxidized products (**Fig. S3A**), with the exception of reactions with AscA (**Fig. S6**). The legend  
132 code displayed in panel B applies also to panels A and C. Error bars show  $\pm$  s.d. (n = 3).  
133

134 To determine the role of H<sub>2</sub>O<sub>2</sub>, we then analyzed initial LPMO rates in the presence of a  
135 reductant and varying concentrations of exogenous H<sub>2</sub>O<sub>2</sub> (**Fig. S9**). A spectacular increase in  
136 initial LPMO rates was observed at the lower H<sub>2</sub>O<sub>2</sub> concentrations, with up to 26-fold more  
137 soluble oxidized products being released from Avicel by ScLPMO10C after 2 minutes when  
138 incubated in the presence of 200  $\mu$ M H<sub>2</sub>O<sub>2</sub> (**Fig. S9C**). This increase in activity is in the same  
139 order of magnitude as the increases reported for the Chl/light+AscA system (**Fig. S3E** and (19)).  
140 At higher H<sub>2</sub>O<sub>2</sub> concentrations, the LPMO reactions stopped very rapidly. Exogenous H<sub>2</sub>O<sub>2</sub>  
141 affected the activity of a fungal LPMO9 from *Phanerochaete chrysosporium* K-3 (PcLPMO9D)  
142 (**Fig. S9D-F**), another type of cellulose-active bacterial LPMO10, ScLPMO10B (**Fig. S9G-I**),  
143 and a chitin-active LPMO10, CBP21 (**Fig. S9K-L**), in a similar manner, but significant  
144 differences were observed in terms of the degree of activity enhancement and the sensitivity to  
145 H<sub>2</sub>O<sub>2</sub> (note that the rate enhancement for CBP21 is >100-fold; **Fig. S9L**) Control reactions in  
146 which the enzyme was replaced by Cu(II)SO<sub>4</sub> did not show any oxidized products (**Fig. S10**).

147 The results described above suggest a catalytic mechanism in which an H<sub>2</sub>O<sub>2</sub>-derived  
148 oxygen atom, rather than an O<sub>2</sub>-derived oxygen atom, would be introduced into the  
149 polysaccharide chain. In the proposed mechanism (**Fig. 2**), a priming reduction of the LPMO-  
150 Cu(II) to LPMO-Cu(I) occurs first. H<sub>2</sub>O<sub>2</sub> would then bind to the Cu(I) center and homolytic bond  
151 cleavage, similar to what happens during Fenton chemistry, would produce a hydroxyl radical.  
152 This likely leads to formation of a Cu(II)-hydroxide intermediate and a substrate radical by one  
153 of several possible pathways (**Fig. S11**). In each of these mechanisms, the reaction between a  
154 copper-hydroxyl intermediate and the substrate radical leads to hydroxylation of the substrate  
155 and to regeneration of the Cu(I) center, which can enter a new catalytic cycle.

156

157

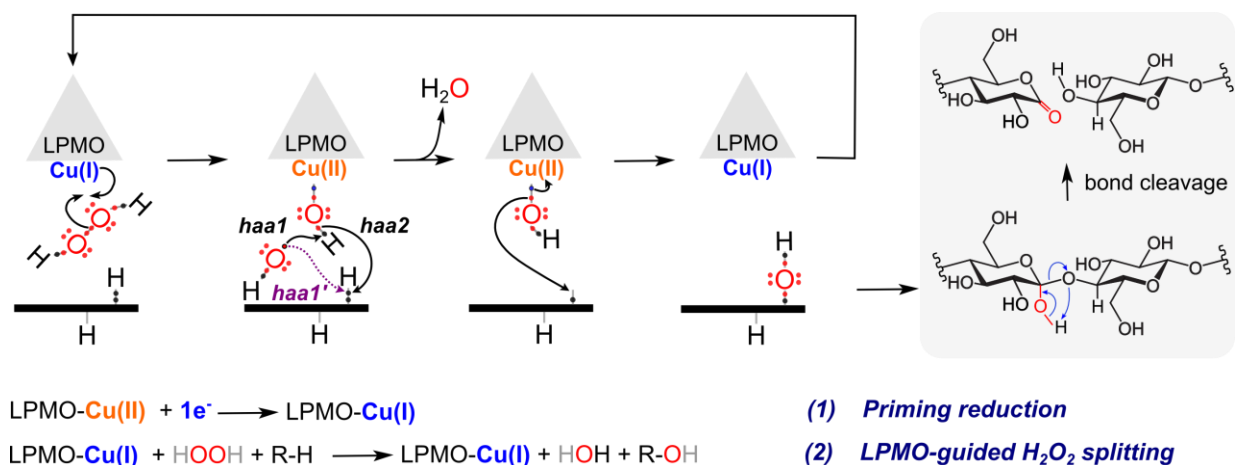

158  
159

160 **Fig. 2. Proposed LPMO-guided H<sub>2</sub>O<sub>2</sub> splitting mechanism for enzymatic oxidative cleavage**  
 161 **of polysaccharides.** In the proposed mechanism, LPMO-Cu(II) is first reduced to LPMO-Cu(I)  
 162 (“priming reduction”), followed by H<sub>2</sub>O<sub>2</sub> binding and homolytic bond cleavage. This cleavage  
 163 leads to the Fenton-like generation of a hydroxyl radical, catalyzing HAA either from the Cu(II)-  
 164 hydroxide (haa1) or from the substrate (haa1’). The former scenario would generate a copper-  
 165 oxyl intermediate that can abstract a hydrogen atom from the substrate (haa2). In both scenarios  
 166 a water molecule is eliminated and attack of the Cu(II)-hydroxide on the substrate radical leads  
 167 to hydroxylation of the substrate and to regeneration of the Cu(I) center, which can enter a new  
 168 catalytic cycle. The resulting hydroxylated polysaccharide undergoes molecular rearrangement  
 169 leading to lactone formation and bond cleavage (15). The previously proposed reaction scheme  
 170 for an O<sub>2</sub>-dependent reaction is:  $\text{LPMO-Cu(II)} + \text{O}_2 + \text{R-H} + 2e^- + 2\text{H}^+ \rightarrow \text{LPMO-Cu(II)} + \text{H}_2\text{O}$   
 171  $+ \text{R-OH}$ . See **Fig. S11** for further details.

172

173 To test this pathway and obtain final proof of H<sub>2</sub>O<sub>2</sub> being the catalytically relevant co-  
 174 substrate of LPMOs, additional experiments were carried out (**Fig. 3**). **Figures 3A&B** show that  
 175 LPMO-dependent consumption of H<sub>2</sub>O<sub>2</sub> (**Fig. 3A**) correlates with the release of oxidized  
 176 products (**Fig. 3B**). Importantly, these experiments were done using catalytic (rather than  
 177 putatively stoichiometric) amounts of reductant (10 μM; i.e. 100 times lower than commonly  
 178 used concentrations; **Fig. S12**) to assess the concept of a “priming reduction” and to reduce the  
 179 effect of AscA on H<sub>2</sub>O<sub>2</sub> stability (**Fig. S13**). **Fig. 3B** shows that product levels are much higher  
 180 than the total amount of AscA added. This is in agreement with the proposed mechanism in  
 181 which a reduced LPMO can catalyze several reactions provided that the co-substrate, H<sub>2</sub>O<sub>2</sub>, is  
 182 supplied. Analogous results were obtained when using a glucose oxidase from *Aspergillus niger*  
 183 (*AnGOX*), for controlled *in situ* generation of H<sub>2</sub>O<sub>2</sub>. **Fig. S14** shows that the glucose/*AnGOX*  
 184 system boosts *ScLPMO10C* activity in a dose-dependent manner, but only if the LPMO is  
 185 reduced by a reductant added in small amounts (**Fig. S14**).

186           As a consequence of the above findings, LPMOs should be able to work under anaerobic  
187 conditions, which indeed was observed (**Fig. 3C**; **Fig. S15**). **Fig. 3C** shows that stable kinetics  
188 are obtained by adding H<sub>2</sub>O<sub>2</sub> and reducing equivalents gradually to the reaction mixture and that  
189 the reaction rate is independent of the presence of O<sub>2</sub>. Finally, experiments with a labeled co-  
190 substrate, H<sub>2</sub><sup>18</sup>O<sub>2</sub>, showed that indeed, the oxygen introduced into the polysaccharide chain  
191 comes from H<sub>2</sub>O<sub>2</sub> and not from O<sub>2</sub> (**Figs. 3D, S16-S18**). For example, **Fig. 3D** shows that when  
192 using H<sub>2</sub><sup>18</sup>O<sub>2</sub>, the characteristic peaks for sodium adducts of the aldonic acid form of an oxidized  
193 cellohexaose (*m/z* 1029.7 & 1051.7) shifted by +2 Da. Similar observations were made for the  
194 chitin-active LPMO10 CBP21 (**Fig. S16**) and a fungal cellulose-active LPMO9 (**Fig. S17**).  
195 Reactions with lower concentrations of H<sub>2</sub><sup>18</sup>O<sub>2</sub> showed that even in the presence of a 10-fold  
196 surplus of <sup>16</sup>O<sub>2</sub>, the oxidized products carry <sup>18</sup>O (**Fig. S18**). Finally, a competition experiment  
197 with a peroxidase and an LPMO showed that the peroxidase completely inhibited LPMO  
198 activity, despite the presence of O<sub>2</sub> and reducing power (AscA or lactose/CDH; **Fig. S19**).  
199 Altogether, the experiments depicted in **Fig. 3** and **Figs S15-S19** unequivocally show that H<sub>2</sub>O<sub>2</sub>  
200 is the catalytically relevant co-substrate for LPMO-catalyzed oxidation of a polysaccharide.

201

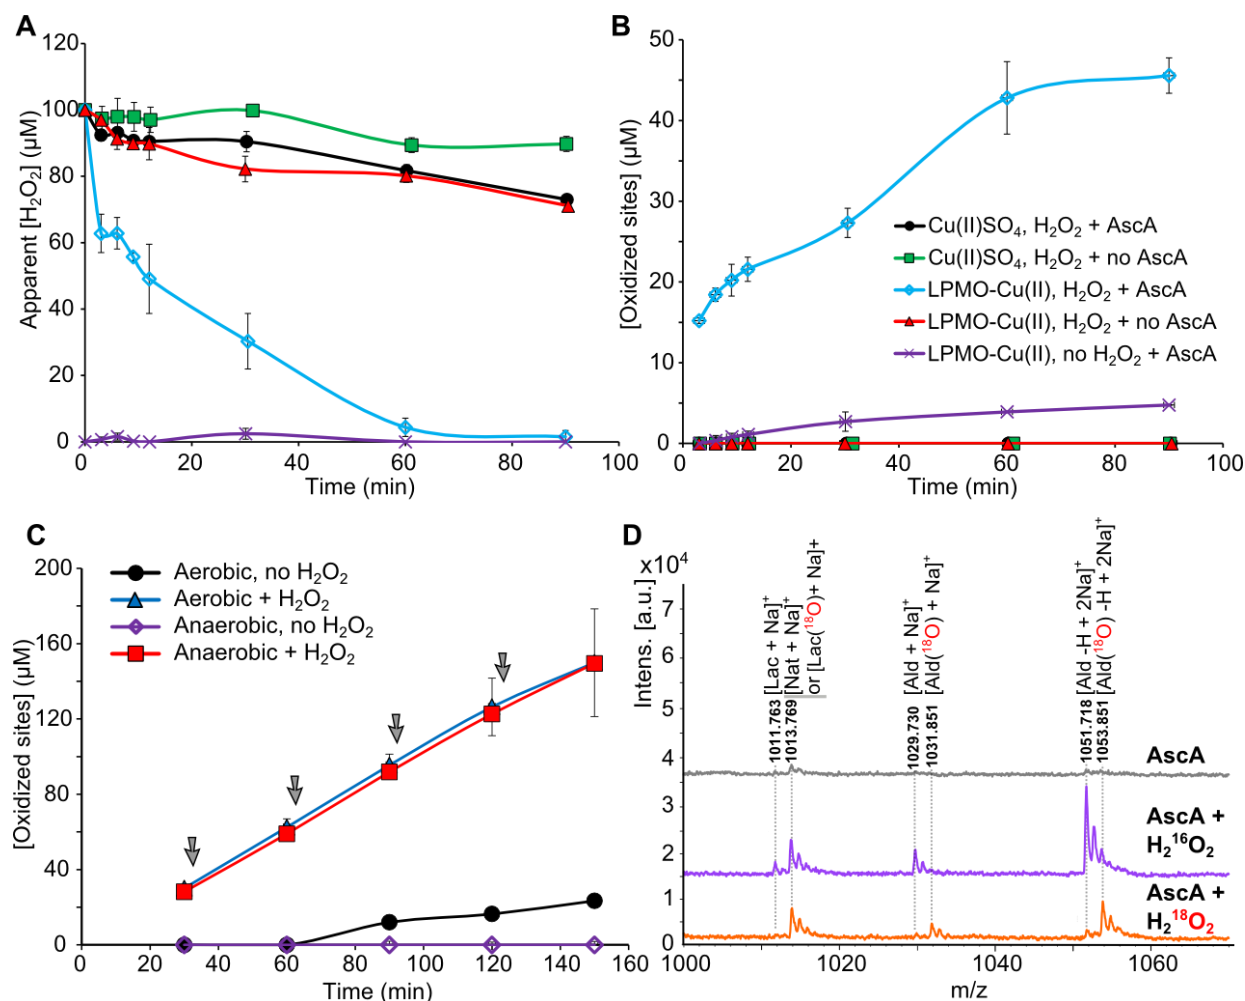

202  
203  
204  
205  
206  
207  
208  
209  
210  
211  
212  
213  
214  
215  
216  
217  
218  
219  
220  
221  
222

**Fig. 3. Probing the H<sub>2</sub>O<sub>2</sub>-dependent pathway of LPMOs.** Panels A and B show H<sub>2</sub>O<sub>2</sub> consumption (A) and soluble product formation (B) during incubation of *Sc*LPMO10C-Cu(II) and Avicel in the presence or absence of initial exogenous H<sub>2</sub>O<sub>2</sub> (100  $\mu M$ ). In control reactions *Sc*LPMO10C-Cu(II) was replaced by Cu(II)SO<sub>4</sub> (0.5  $\mu M$ ). The reaction was initiated by addition of AscA (10  $\mu M$ ) where indicated. Note that this is a very low AscA concentration, meant to test the “priming reduction” hypothesis (see text for details). The legend code for panels A and B is indicated in the latter. Note that not all LPMO products are soluble, explaining why the levels of consumed H<sub>2</sub>O<sub>2</sub> and detected products are not identical. (C) The graphs show time-courses for release of aldonic acid products by *Sc*LPMO10C from Avicel under anaerobic or aerobic conditions at 30 °C. All the reactions were initiated by addition of AscA (10  $\mu M$ ) supplemented with H<sub>2</sub>O<sub>2</sub> (50  $\mu M$ ) when indicated. AscA and H<sub>2</sub>O<sub>2</sub> additions were repeated right after sampling, i.e. every 30 minutes (grey arrows). (D) MALDI-TOF MS spectra of products obtained after 4 min reaction in the presence of 100  $\mu M$  H<sub>2</sub><sup>16</sup>O<sub>2</sub> or H<sub>2</sub><sup>18</sup>O<sub>2</sub>, as indicated, and 1 mM AscA. The spectrum shows the hexose cluster, showing sodium adducts of the native (Nat) hexose, and the two forms of the oxidized hexose, the lactone (Lac) and the aldonic acid (Ald). All reactions (panel A to D) were carried out with *Sc*LPMO10C-Cu(II) (0.5  $\mu M$ ) and Avicel (10 g.L<sup>-1</sup>) in sodium phosphate buffer (50 mM, pH 7.0) at 40 °C under magnetic stirring (unless stated otherwise). The error bars show s.d. (n = 3).



223 Several of the reaction progress curves discussed above show that LPMOs are readily  
 224 inactivated and under some conditions, such as when using the Chl/light-AscA system (**Fig. 1A**,  
 225 **Fig. S3D**), inactivation seems to occur within a few minutes. Enzyme inactivation was confirmed  
 226 by a series of experiments where the LPMO was pre-incubated and then tested for remaining  
 227 activity (**Fig. S20**). Enzyme inactivation was similar in the presence of EDTA, showing that  
 228 inactivation is not due to free metal-catalyzed generation of hydroxyl radicals. Importantly,  
 229 inactivation was partly avoided by the presence of substrate (**Fig. S20**). Using proteomics  
 230 technologies, we found that the inactivated LPMO had undergone several oxidative  
 231 modifications that were confined to the catalytic histidines and, to a lesser extent, neighboring  
 232 residues (**Figs. 4, S21, S22**). Other residues prone to oxidative damage, such as surface exposed  
 233 residues in the LPMO domain, the linker or the CBM were not modified (**Fig. S23**). This leads to  
 234 the important conclusion that oxidative damage is not caused by ROS in solution, as has been  
 235 suggested (23), but by ROS generated in the catalytic center, i.e. *in situ*, by enzyme-generated  
 236 hydroxyl radicals with diffusion-limited timescale reactivity. The protective effect of the  
 237 substrate (**Fig. S20, S24**), was reflected in reduced oxidative damage of the N-terminal catalytic  
 238 histidine (**Fig. 4B**). The higher sensitivity of the N-terminal histidine may be related to the  
 239 orientation of the reactive oxygen species during catalysis.

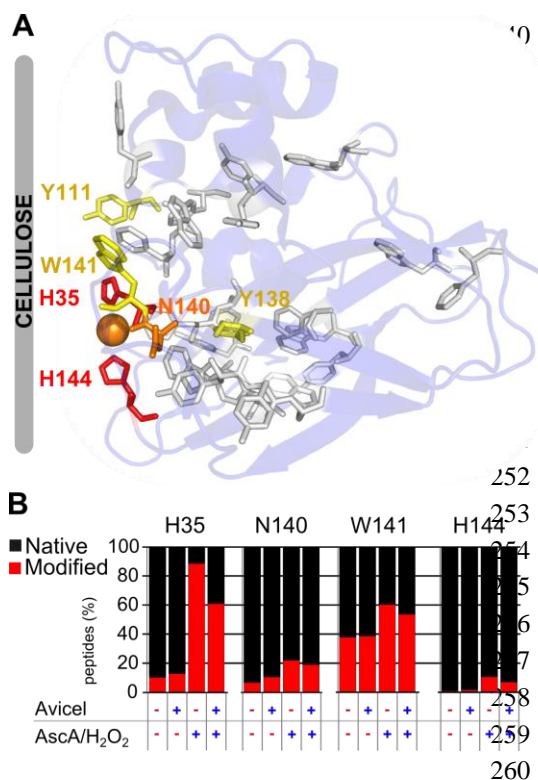

**Fig. 4. LPMO self-oxidation and the protective role of the substrate.** (A) Mapping of modified residues on the structure of the catalytic domain of ScLPMO10C (PDB 4OY7 (24)) reveals that oxidation occurs in and near the active site, predominantly on the catalytic histidines, H35 and H144. The color code highlights the degree of oxidation: high (red), middle (orange) and low (yellow). For aromatic residues shown as grey sticks no modification was detected (See **Fig. S21-S23**). (B) Impact of substrate on the ratio of modified/native peptides bearing H35, N140, W141 or H144 after a short incubation (i.e. a less drastic treatment compared to panel A). ScLPMO10C (1  $\mu$ M) was pre-treated by 20 min incubation in sodium phosphate buffer (50 mM, pH 7.0) at 40 °C under magnetic stirring, in the presence (10 g.L<sup>-1</sup>) or absence of Avicel and addition of either AscA (1mM)/H<sub>2</sub>O<sub>2</sub> (100  $\mu$ M) or simply water (control reaction). (See **Fig. S24** for corresponding activity tests).

261

262 The present findings unequivocally show that H<sub>2</sub>O<sub>2</sub>, and not O<sub>2</sub>, is the catalytically  
263 relevant co-substrate of LPMOs, implying that they should perhaps be called peroxygenases (or  
264 LPPO). Basically, LPMOs, after a priming reduction, carry out Fenton-type chemistry in a  
265 controlled and substrate-associated manner. From a biological point of view, such a scenario  
266 makes more sense than the seemingly somewhat random generation of dangerous hydroxyl  
267 radicals in the classical Fenton concept. Although the use of H<sub>2</sub>O<sub>2</sub> by redox enzymes (e.g.  
268 peroxidases) is well-known, to the best of our knowledge, the biochemistry of the LPMO  
269 reaction as unraveled in this study, is unprecedented in Nature (25, 26).

270 LPMOs were initially classified as monooxygenases because experiments with <sup>18</sup>O<sub>2</sub> and  
271 using AscA as reductant, showed that one labeled oxygen atom was incorporated in the oxidized  
272 product (4). The proposed monooxygenase mechanism is well known (26, 27), seems “logical”,  
273 and has not been challenged until now. Strictly spoken, however, the seminal 2010 experiment  
274 with labeled oxygen did not show that O<sub>2</sub> is the catalytically relevant co-substrate. In fact, other  
275 reactive oxygen species generated from O<sub>2</sub> may have been the co-substrate, including H<sub>2</sub>O<sub>2</sub>,  
276 which indeed is produced under the conditions used (as shown in Fig. S6C). Importantly, the  
277 H<sub>2</sub>O<sub>2</sub>-pathway described here should not be confused with the “peroxide shunt” pathway that has  
278 been described for several monooxygenase reactions carried out by binuclear iron/copper  
279 enzymes, non-coupled binuclear copper enzymes and mononuclear iron enzymes containing  
280 additional co-factors such as porphyrin or biopterin. Such a “peroxide shunt” normally refers to a  
281 slow, rather artificial reaction that requires high concentrations of H<sub>2</sub>O<sub>2</sub> (10-100 mM) and that is  
282 sometimes harnessed to avoid the use of reductants and O<sub>2</sub> (28, 29). These shunt pathways  
283 involve the oxidized resting state of the enzyme and tend to lead to unstable reactions with a  
284 limited number of turnovers. The situation for LPMOs is very different and truly unique. LPMOs  
285 are mono-copper enzymes with no other co-factors, that, after an essential priming reduction,  
286 display stable reaction kinetics with multiple turnovers at low (sub mM) H<sub>2</sub>O<sub>2</sub> concentrations.

287 Our findings explain several hitherto unexplained phenomena in LPMO biochemistry: (i)  
288 The consecutive delivery of two external electrons to the catalytic center is difficult to envisage,  
289 but with H<sub>2</sub>O<sub>2</sub> being the co-substrate, recruitment of two electrons is not needed. (ii) The widely  
290 observed non-linearity of process kinetics is partly due to the self-inactivation of the LPMOs.  
291 (iii) The fact that most published catalytic rates for LPMOs are low and similar, and, most  
292 remarkably, independent of the LPMO or the substrate used (4, 14, 21), is likely due to the fact

293 that the rate-limiting factor in most experiments was H<sub>2</sub>O<sub>2</sub> formation. This point is well  
294 illustrated by a recent study demonstrating that the rate of a chitin-active LPMO fueled by the  
295 lactose/CDH system and the rate of H<sub>2</sub>O<sub>2</sub> production by the latter system (in the absence of an  
296 LPMO) are similar (16). (iv) The increase in LPMO rate observed by Cannella et al. in their  
297 study on light-activation of LPMOs is due to production of hydrogen peroxide, not to the  
298 generation of some sort of “high energy electron” (19). (v) The observation that dehydrogenases  
299 can drive LPMO activity while strict oxidases cannot ((30) & Fig. S14) is due to the fact that,  
300 while both these enzyme types can produce H<sub>2</sub>O<sub>2</sub>, only the former can reduce the LPMO (11).

301 As to the level of H<sub>2</sub>O<sub>2</sub> under reaction conditions, it is important to note that,  
302 notwithstanding the current findings, LPMOs are capable of activating molecular oxygen, albeit  
303 at low apparent rate (8, 31). It is well known that LPMOs generate H<sub>2</sub>O<sub>2</sub> in the absence of  
304 substrate, which leads to the remarkable conclusion that LPMOs can generate their own co-  
305 substrate from O<sub>2</sub>. This property may have biological implications since H<sub>2</sub>O<sub>2</sub> generated by  
306 unbound enzymes (several LPMOs display low substrate-binding) may be used by the substrate-  
307 bound population to degrade the substrate, explaining why H<sub>2</sub>O<sub>2</sub> production by LPMOs is not  
308 observed in the presence of substrate (16, 32). It is conceivable that H<sub>2</sub>O<sub>2</sub> interacts more strongly  
309 with substrate-bound, reduced LPMOs, compared to LPMOs in solution, which would explain  
310 why low concentrations of exogenous H<sub>2</sub>O<sub>2</sub> are beneficial for activity, whereas higher  
311 concentrations lead to self-destructive reactions on unbound enzymes. Notably, the assumption  
312 that substrate-affinity has an impact on H<sub>2</sub>O<sub>2</sub> management and self-destruction by the LPMOs  
313 sheds new light on the role of the CBMs that are appended to some LPMOs, including  
314 ScLPMO10C.

315 The link between H<sub>2</sub>O<sub>2</sub>, Fenton-type systems and enzymatic biomass depolymerization  
316 has been a matter of debate, controversy and investigations for several decades. The present  
317 findings reveal a novel role for H<sub>2</sub>O<sub>2</sub>. Glucose-methanol-choline (GMC) oxidoreductases are  
318 known H<sub>2</sub>O<sub>2</sub> producers and, like LPMOs, abundant in fungal secretomes (11). Some GMC  
319 oxidoreductases can reduce LPMOs (11, 30), but their ability to produce H<sub>2</sub>O<sub>2</sub>, perhaps in a  
320 controlled manner, could be another important biological function, as suggested by our  
321 experiment showing that a reduced LPMO can be fueled by the H<sub>2</sub>O<sub>2</sub> generating glucose/glucose  
322 oxidase system. Along the same line, a recent study of the secretome of *Aspergillus nidulans*  
323 grown on starches revealed co-secretion of LPMOs, catalase and H<sub>2</sub>O<sub>2</sub>-producing

324 oxidoreductases (AA3, AA7) in the absence of known H<sub>2</sub>O<sub>2</sub>-consuming partners such as  
325 peroxidases (33). It is noteworthy that the present findings may also be relevant for  
326 understanding host-pathogen interactions since for instance LPMO-producing necrotrophic  
327 bacteria are known to benefit from H<sub>2</sub>O<sub>2</sub> generated by the plant defense system (34).

328         The present findings will have far-reaching implications for the design of biorefining  
329 processes, including the production of cellulosic ethanol. LPMOs are important components of  
330 current commercial cellulase cocktails (12) but proper aeration and delivery of electrons at  
331 industrial scale are considered major challenges as is the instability of LPMOs. We show here  
332 that LPMO performance and stability can be controlled by regulating the supply of H<sub>2</sub>O<sub>2</sub>, a  
333 liquid, cheap and easy-to-handle industrial bulk chemical. We further show that LPMOs can act  
334 in the presence of only catalytic amounts of reductant, which abolishes reductant-induced  
335 undesirable redox side reactions, and in the absence of oxygen, which eliminates the need for  
336 aeration. So far, the application of LPMOs has likely been hampered by suboptimal process  
337 conditions and it seems evident that further process improvements may be achieved now that the  
338 role of H<sub>2</sub>O<sub>2</sub> has been uncovered. Notably, overdosing LPMOs can be a problem, since lack of  
339 LPMO binding sites on the substrate may lead to LPMO inactivation. It is conceivable that  
340 careful balancing of LPMOs and hydrolytic enzymes (e.g. cellulases) is needed, with the  
341 cellulases “peeling off” LPMO-disrupted polymer chains from the substrate surface, thus  
342 exposing new LPMO binding sites. As to LPMO stability, it is interesting to note that one of the  
343 residues most vulnerable to oxidation, the N-terminal catalytic histidine, is methylated in fungal  
344 LPMOs. Perhaps this methylation helps protecting the fungal LPMOs from oxidative self-  
345 destruction.

346         In the six years after their discovery (4), the role of H<sub>2</sub>O<sub>2</sub> in LPMO catalysis has been  
347 overlooked, despite intense worldwide research on these enzymes. It is tempting to speculate that  
348 a similar situation may exist for other enzymes, in particular for copper monooxygenases that are  
349 thought to require two electrons and molecular oxygen. It has not escaped our notice that the still  
350 enigmatic particulate methane monooxygenase (pMMO), whose active site bears some  
351 resemblance to LPMO active sites, displays LPMO-like H<sub>2</sub>O<sub>2</sub>-related features: it has been  
352 reported that production of H<sub>2</sub>O<sub>2</sub> by pMMO is lower in presence of substrate (35) and that H<sub>2</sub>O<sub>2</sub>  
353 binds to and can oxidize the pMMO active site (36). It is conceivable that the present findings

354 have implications beyond understanding and optimizing the enzymatic conversion of recalcitrant  
355 polysaccharides by LPMOs.

356

## 357 References

- 358 1. S. M. Cragg *et al.*, Lignocellulose degradation mechanisms across the Tree of Life. *Curr. Opin. Chem. Biol.*  
359 **29**, 108–119 (2015).
- 360 2. S. Gligorovski, R. Strekowski, S. Barbati, D. Vione, Environmental implications of hydroxyl radicals ( $\bullet$ OH).  
361 *Chem. Rev.* **115**, 13051–13092 (2015).
- 362 3. V. Arantes, B. Goodell, *Current understanding of brown-rot fungal biodegradation mechanisms : a review*  
363 (2014).
- 364 4. G. Vaaje-Kolstad *et al.*, An oxidative enzyme boosting the enzymatic conversion of recalcitrant  
365 polysaccharides. *Science*. **330**, 219–222 (2010).
- 366 5. S. J. Horn, G. Vaaje-Kolstad, B. Westereng, V. G. Eijsink, Novel enzymes for the degradation of cellulose.  
367 *Biotechnol. Biofuels*. **5**, 45 (2012).
- 368 6. R. J. Quinlan *et al.*, Insights into the oxidative degradation of cellulose by a copper metalloenzyme that  
369 exploits biomass components. *Proc. Natl. Acad. Sci. U. S. A.* **108**, 15079–15084 (2011).
- 370 7. C. M. Phillips, W. T. Beeson, J. H. Cate, M. A. Marletta, Cellobiose dehydrogenase and a copper-dependent  
371 polysaccharide monooxygenase potentiate cellulose degradation by *Neurospora crassa*. *ACS Chem. Biol.* **6**,  
372 1399–1406 (2011).
- 373 8. C. H. Kjaergaard *et al.*, Spectroscopic and computational insight into the activation of O<sub>2</sub> by the  
374 mononuclear Cu center in polysaccharide monooxygenases. *Proc. Natl. Acad. Sci. U. S. A.* **111**, 8797–8802  
375 (2014).
- 376 9. W. T. Beeson, V. V. Vu, E. A. Span, C. M. Phillips, M. A. Marletta, Cellulose degradation by  
377 polysaccharide monooxygenases. *Annu. Rev. Biochem.* **84**, 923–946 (2015).
- 378 10. P. H. Walton, G. J. Davies, On the catalytic mechanisms of lytic polysaccharide monooxygenases. *Curr.*  
379 *Opin. Chem. Biol.* **31**, 1–13 (2016).
- 380 11. D. Kracher *et al.*, Extracellular electron transfer systems fuel cellulose oxidative degradation. *Science*. **352**,  
381 1098–1101 (2016).
- 382 12. K. S. Johansen, Discovery and industrial applications of lytic polysaccharide mono-oxygenases. *Biochem.*  
383 *Soc. Trans.* **44**, 143–149 (2016).
- 384 13. S. Kim, J. Ståhlberg, M. Sandgren, R. S. Paton, G. T. Beckham, Quantum mechanical calculations suggest  
385 that lytic polysaccharide monooxygenases use a copper-oxyl, oxygen-rebound mechanism. *Proc. Natl. Acad.*  
386 *Sci. U. S. A.* **111**, 149–154 (2014).
- 387 14. K. E. H. Frandsen *et al.*, The molecular basis of polysaccharide cleavage by lytic polysaccharide  
388 monooxygenases. *Nat. Chem. Biol.* **12**, 298–303 (2016).
- 389 15. W. T. Beeson, C. M. Phillips, J. H. D. Cate, M. A. Marletta, Oxidative cleavage of cellulose by fungal  
390 copper-dependent polysaccharide monooxygenases. *J. Am. Chem. Soc.* **134**, 890–892 (2012).
- 391 16. J. S. M. Loose *et al.*, Activation of bacterial lytic polysaccharide monooxygenases with cellobiose  
392 dehydrogenase. *Protein Sci.* **25**, 2175–2186 (2016).
- 393 17. G. R. Hemsworth, B. Henrissat, G. J. Davies, P. H. Walton, Discovery and characterization of a new family  
394 of lytic polysaccharide monooxygenases. *Nat. Chem. Biol.* **10**, 122–126 (2014).
- 395 18. X. Li, W. T. Beeson, C. M. Phillips, M. A. Marletta, J. H. D. Cate, Structural basis for substrate targeting  
396 and catalysis by fungal polysaccharide monooxygenases. *Structure*. **20**, 1051–61 (2012).
- 397 19. D. Cannella *et al.*, Light-driven oxidation of polysaccharides by photosynthetic pigments and a  
398 metalloenzyme. *Nat. Comm.* **7** (2016), doi:10.1038/ncomms11134.
- 399 20. M. Frommhagen *et al.*, Lytic polysaccharide monooxygenases from *Myceliophthora thermophila* C1 differ  
400 in substrate preference and reducing agent specificity. *Biotechnol. Biofuels*. **9**, 1–17 (2016).
- 401 21. J. W. Agger *et al.*, Discovery of LPMO activity on hemicelluloses shows the importance of oxidative  
402 processes in plant cell wall degradation. *Proc. Natl. Acad. Sci. U. S. A.* **111**, 6287–6292 (2014).
- 403 22. L. S. Jahnke, A. W. Frenkel, Evidence for the photochemical production of superoxide mediated by  
404 saponified chlorophyll. **66**, 144–150 (1975).

- 405 23. B. R. Scott, H. Z. Huang, J. Frickman, R. Halvorsen, K. S. Johansen, Catalase improves saccharification of  
406 lignocellulose by reducing lytic polysaccharide monooxygenase-associated enzyme inactivation. *Biotechnol.*  
407 *Lett.* **38**, 425–434 (2016).
- 408 24. Z. Forsberg *et al.*, Structural and functional characterization of a conserved pair of bacterial cellulose-  
409 oxidizing lytic polysaccharide monooxygenases. *Proc. Natl. Acad. Sci. U. S. A.* **111**, 8446–8451 (2014).
- 410 25. L. M. Mirica, X. Ottenwaelder, T. D. P. Stack, Structure and Spectroscopy of Copper – Dioxygen  
411 Complexes. **104**, 1013–1045 (2004).
- 412 26. E. I. Solomon *et al.*, Copper active sites in biology. *Chem. Rev.* **114**, 3659–3853 (2014).
- 413 27. J. P. Klinman, Mechanisms whereby mononuclear copper proteins functionalize organic substrates. *Chem.*  
414 *Rev.* **96**, 2541–2562 (1996).
- 415 28. P. C. Cirino, F. H. Arnold, A self-sufficient peroxide-driven hydroxylation biocatalyst. *Angew. Chemie - Int.*  
416 *Ed.* **42**, 3299–3301 (2003).
- 417 29. E. G. Hrycay, S. M. Bandiera, Monooxygenase, peroxidase and peroxygenase properties and reaction  
418 mechanisms of cytochrome P450 enzymes. *Adv. Exp. Med. Biol.* **851**, 1–61 (2012).
- 419 30. S. Garajova *et al.*, Single-domain flavoenzymes trigger lytic polysaccharide monooxygenases for oxidative  
420 degradation of cellulose. *Sci. Rep.* **6**, 1–9 (2016).
- 421 31. R. Kittl, D. Kracher, D. Burgstaller, D. Haltrich, R. Ludwig, Production of four *Neurospora crassa* lytic  
422 polysaccharide monooxygenases in *Pichia pastoris* monitored by a fluorimetric assay. *Biotechnol. Biofuels.*  
423 **5**, 79 (2012).
- 424 32. T. Isaksen *et al.*, A C4-oxidizing lytic polysaccharide monooxygenase cleaving both cellulose and cello-  
425 oligosaccharides. *J. Biol. Chem.* **289**, 2632–2642 (2014).
- 426 33. L. Nekiunaite, M. Ø. Arntzen, B. Svensson, G. Vaaje-Kolstad, M. Abou Hachem, Lytic polysaccharide  
427 monooxygenases and other oxidative enzymes are abundantly secreted by *Aspergillus nidulans* grown on  
428 different starches. *Biotechnol. Biofuels.* **9**, 1–16 (2016).
- 429 34. K. S. Johansen, Lytic polysaccharide monooxygenases: the microbial power tool for lignocellulose  
430 degradation. *Trends Plant Sci.* **21**, 926–936 (2016).
- 431 35. A. Miyaji, M. Suzuki, T. Baba, T. Kamachi, I. Okura, Hydrogen peroxide as an effector on the inactivation  
432 of particulate methane monooxygenase under aerobic conditions. *J. Mol. Catal. B Enzym.* **57**, 211–215  
433 (2009).
- 434 36. M. A. Culpepper, G. E. Cutsail, B. M. Hoffman, A. C. Rosenzweig, Evidence for oxygen binding at the  
435 active site of particulate methane monooxygenase. *J. Am. Chem. Soc.* **134**, 7640–7643 (2012).

436

437

438 **Acknowledgments:** We thank Bjørge Westereng at NMBU, Ås and Mats Sandgren at SLU,  
439 Uppsala, Sweden for providing a sample of a purified recombinant fungal AA9 (*PcLPMO9D*).  
440 We thank Jennifer Loose at NMBU, Ås for providing the catalase katE. B.B. has received the  
441 support of the EU in the framework of the Marie-Curie FP7 COFUND People Programme,  
442 through the award of an AgreeSkills fellowship (under grant agreement n° 267196). The  
443 postdoctoral fellowship of B.B. was also supported by the French Institut National de la  
444 Recherche Agronomique (INRA) [CJS]. This work was also supported by the Research Council  
445 of Norway through grants 214613, 240967, 243950 and 249865, and by the Vista programme of  
446 The Norwegian Academy of Science and Letters through grant 6510.

447

## 448 **Supplementary Materials:**

449 Materials and Methods

450 Figures S1-S24

451 References (1-60)
